# Supplementary material for: Comparative analysis of biomechanical characteristics between the new Tai Chi elastic band exercise for opening and closing movement and elastic band resistance training for the reverse fly movement
Source: PeerJ. 2024 Aug 28;12:e17839. doi: 10.7717/peerj.17839 (PMC11365477; doi:10.7717/peerj.17839)
Supplement: Supplemental Information 7 — The names corresponding to the numbers in the table. [file peerj-12-17839-s007.xlsx]

## Sheet: Sheet1
File	Code	Name
Group	1	Tai Chi elastic band exercise group
	2	Elastic band resistance training group
Sex	1	male
	2	female
Angle	ShoulderHorizontalAbduction	Shoulder Horizontal Abduction
	ElbowFlexion	Elbow Flexion
	ShoulderFlexion	Shoulder Flexion
Angle Velocity	AngleVelocity	Angle Velocity
Fm	Biceps	Biceps brachii
	Triceps	Triceps brachii
	Adeltoid	Anterior deltoid muscle
	Pdeltoid	Posterior deltoid muscle
	Pectoralmajor	Pectoral major muscle
	Latissimusdorsi	Latissimus dorsi
	Infraspinatus	Infraspinatus
	Brachioradialis	Brachioradialis
	Teresminor	Teres minor
	Subscapularis	Subscapularis
	Teresmajor	Teres major
	Brachialis	Brachialis
	Pronatorteres	Pronator teres
	Anconeus	Anconeus
	Mdeltoid	Middle deltoid muscle
	Supraspinatus	Supraspinatus
	Coracobrachialis	Coracobrachialis
Jiont Torque	ShoulderAbductionTorque	Shoulder Abduction Torque
	ShoulderFlexionTorque	Shoulder Flexion Torque
	ShoulderExternalRotationTtorque	Shoulder External Rotation Torque
	ElbowFlexionTorque	Elbow Flexion Torque
	ElbowInternalRotationTorque	Elbow Internal Rotation Torque
RMS	Biceps	Biceps brachii
	Triceps	Triceps brachii
	Adeltoid	Anterior deltoid muscle
	Pdeltoid	Posterior deltoid muscle
	Cucullaris	Cucullaris
	Pectoralmajor	Pectoral major muscle
	Infraspinatus	Infraspinatus
	Latissimusdorsi	Latissimus dorsi
	Serratusanterior	Serratus anterior
	Brachioradialis	Brachioradialis
